# Supplementary material for: Direct Cardiac Epigenetic Reprogramming through Codelivery of 5′Azacytidine and miR-133a Nanoformulation
Source: MDPI journal article supplement (doi:10.3390/ijms232315179), 2022-12-02
Supplement: s1 [file s1]

## Supplementary material

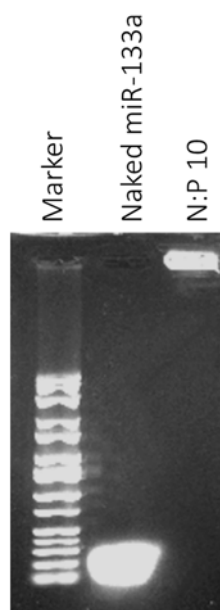

**Figure S1.** : Gel retardation assay of N:P ratio 10. The polyplexes were formed by self-assembly mechanism. Briefly, miR-133a was added to PEI (1mg/mL) at a N:P ratio of 10 and incubated for 30 mins at room temperature. Following the incubation, the polyplexes were loaded on 1% agarose gel with gel red and electrophoresed for 100 V for 30 mins. The bands were visualized using ultraviolet illuminator. The formation of polyplexes were confirmed by the retardation of miR-133a bands.

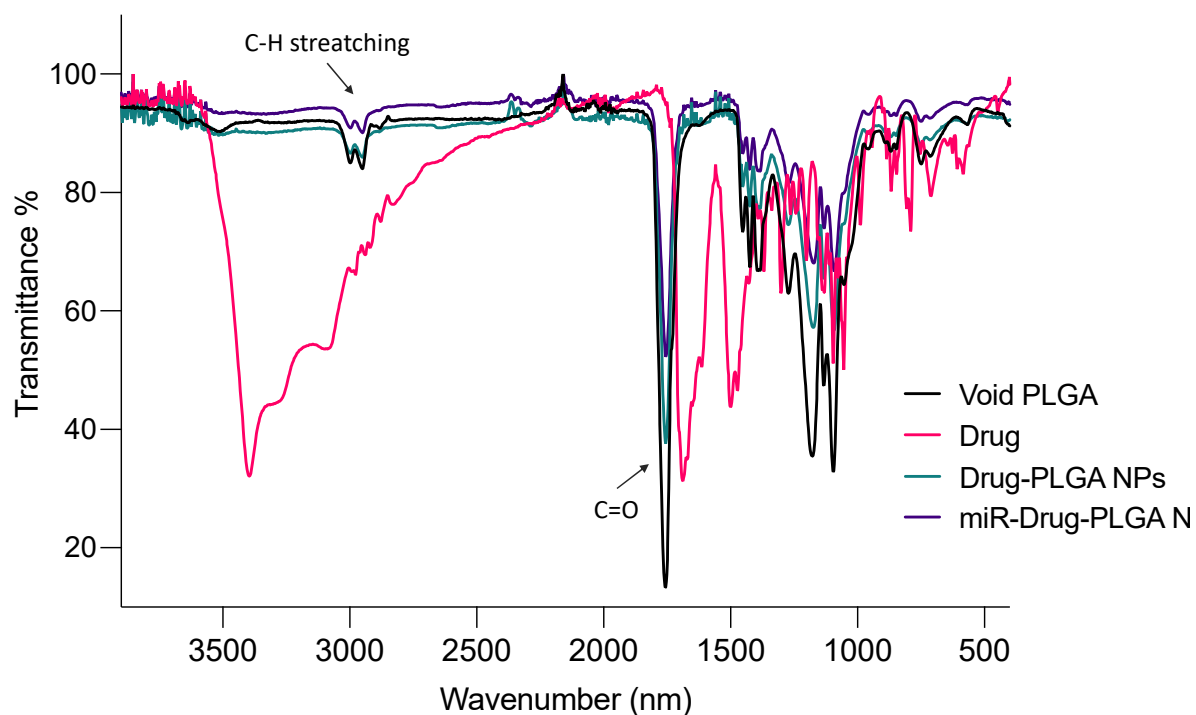

**Figure S2.** FTIR spectra for Void PLGA NPs, Drug, PLGA-AZA NPs and PLGA-PEI-miR-133a-AZA NPs.

**Table S1.** Main peaks of PLGA NPs FTIR spectra.

| Peak position (Wavenumber $\text{cm}^{-1}$ ) | Assignments                                                    |
|----------------------------------------------|----------------------------------------------------------------|
| 3000                                         | Asymmetric $\text{CH}_3$ stretching                            |
| 2952                                         | Asymmetric $\text{CH}_2$ stretching                            |
| 1754                                         | Carbonyl $\text{C}=\text{O}$ stretching (alkyl groups)         |
| 1454                                         | C-H bending of $\text{CH}_3$                                   |
| 1425                                         | CH bending of O-CH, (of glycolic acid) and OH in plane bending |
| 1392                                         | C-H bending of $\text{CH}_3$                                   |
| 1268                                         | C-O stretching of carboxylic acid                              |
| 1180                                         | C-C-O stretching from ester                                    |
| 1093                                         | O-C-C stretching from ester                                    |
| 958                                          | OH bending                                                     |

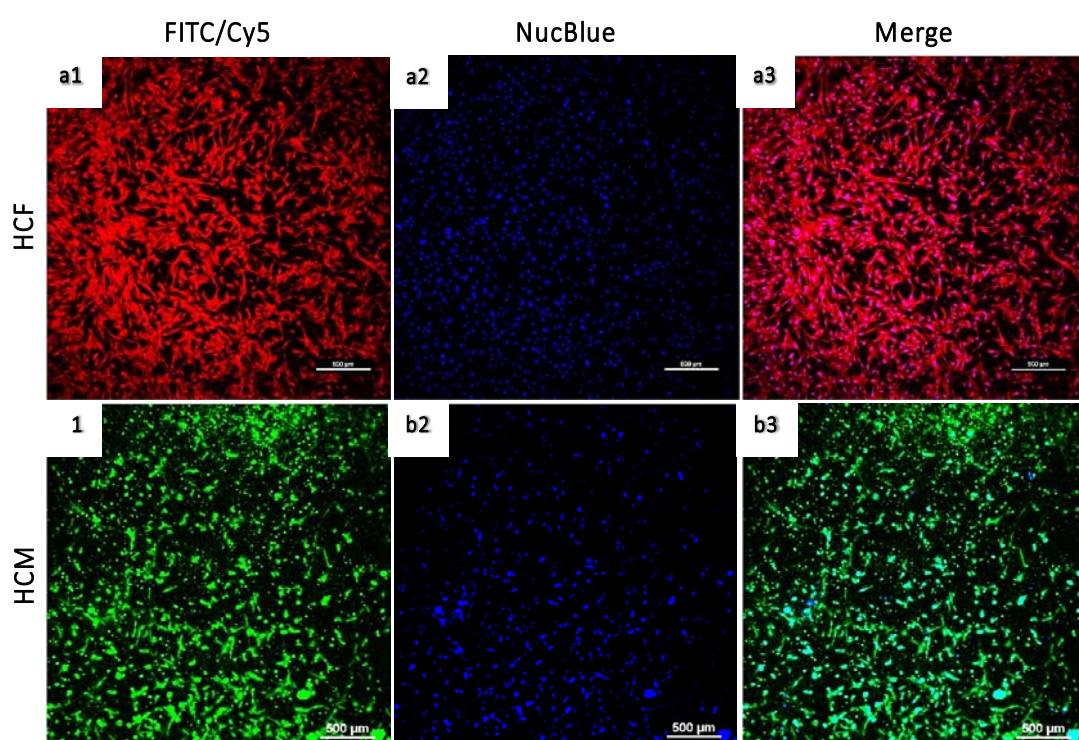

**Figure S3.** Cellular Uptake of PEI-Cy5miR-133a (a1-a3) and PLGA-FITC (b1-b3) and Nanospheres using confocal microscopy in HCF and HCM respectively. The nanospheres were labelled with FITC (green/Cy5(Red)). The cells were incubated with PLGA-FITC NPs/Cy5-miR-133a for 4 h to evaluate cellular internalization of the polymer into the cell. (a1) shows PEI-Cy5-miR-133a uptake by HCF cells. (b1) shows FITC particle internalization by HCM cells. (Scale bar= 500  $\mu\text{m}$ ).

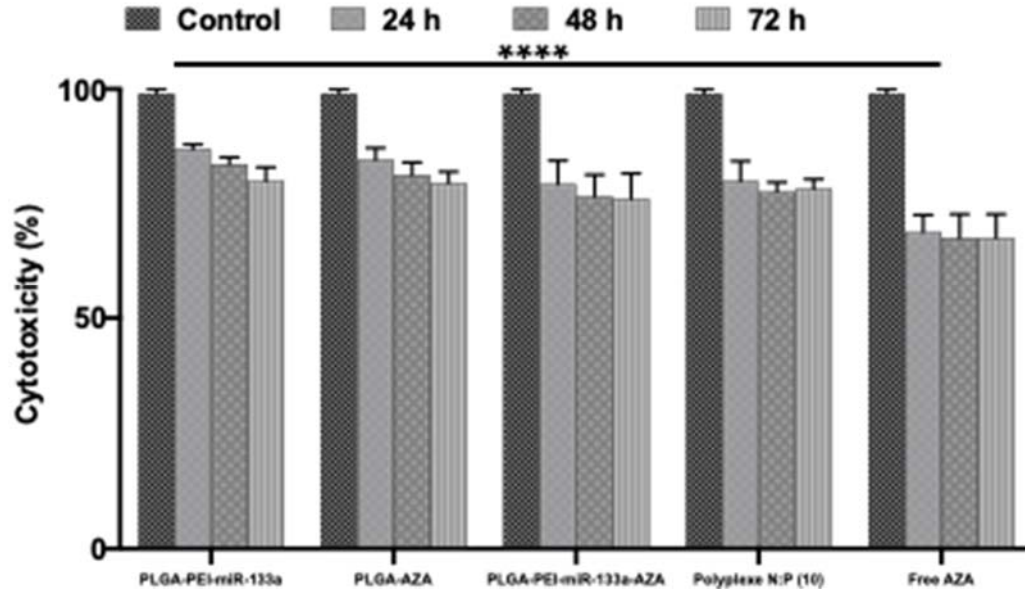

**Figure S4.** Cell viability were evaluated to assess the compatibility of HCM treated with PLGA NPs PLGA-PEI-miR-133a, PLGA-AZA and PLGA-PEI-miR-133a-AZA at a concentration of 100  $\mu$ g/mL in comparison with miR-133a polyplexes (50nM was used to for complex with PEI at an N:P ratio 10) , free drug ( 1 mg/mL) and control for 24 h, 48 h and 72 h. The cell viability of all PLGA NPs were 80% viable at all time point. The ratios of PLGA NPs at all doses and time points demonstrated that the experiment was extremely statistically significant, with  $p < 0.05$  (\*  $p \leq 0.05$  \*\*  $p \leq 0.01$  \*\*\*  $p \leq 0.001$  \*\*\*\*  $p \leq 0.0001$ ). experiment was extremely statistically significant, with  $p < 0.05$  (\*  $p \leq 0.05$  \*\*  $p \leq 0.01$  \*\*\*  $p \leq 0.001$  \*\*\*\*  $p \leq 0.0001$ ).
